# Supplementary material for: Human papillomavirus E7 oncoprotein expression by keratinocytes alters the cytotoxic mechanisms used by CD8 T cells
Source: PubMed Central journal article supplement (PMC5814191; doi:10.18632/oncotarget.23210), 2017-12-14
Supplement: oncotarget-09-6015-s001.pdf [file oncotarget-09-6015-s001.pdf]

## Human papillomavirus E7 oncoprotein expression by keratinocytes alters the cytotoxic mechanisms used by CD8 T cells

### SUPPLEMENTARY MATERIALS

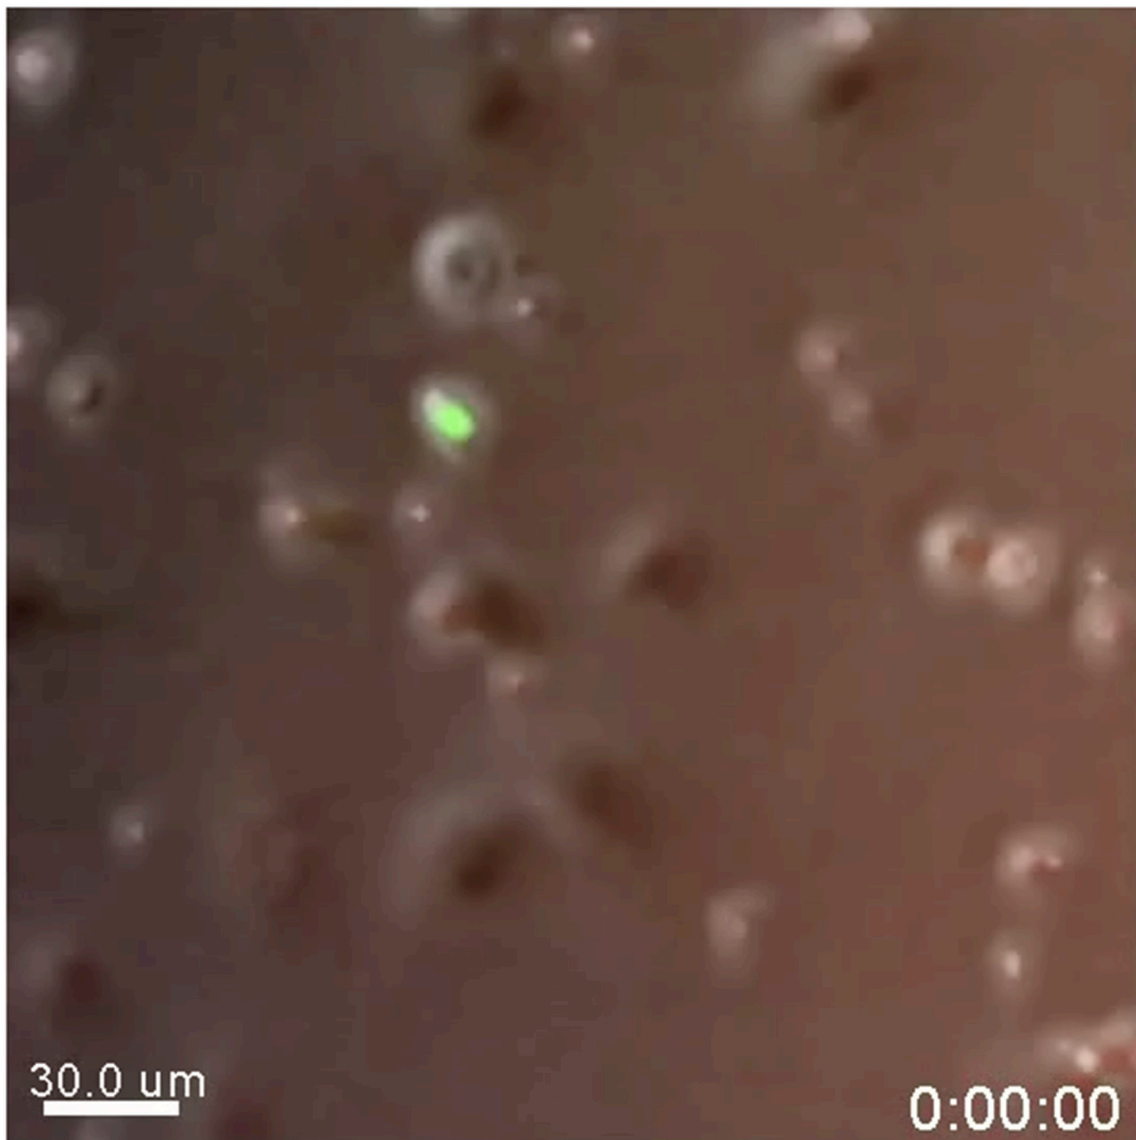

**Supplementary Video 1: EGFP<sup>+</sup>CD8<sup>+</sup> T cells kill KC targets loaded with cognate peptide.** Example of extended-duration microscopy of KC (larger unstained cells) and EGFP<sup>+</sup> effector T cells. Imaging is over 30 hours. The highly motile T cell (green) makes contact with KC targets within 30 min and remains attached for around 5 hours before detaching and moving away. The target cells die after contact several hours later becoming positive for caspase-3 at around 16 hours as indicated by intracellular increase in concentration of indicator dye (red). The T cell also subsequently dies, becoming red. Several other caspase-3 positive and negative KC are visible in the field of view.

See Supplementary Video 1
